# Supplementary material for: The Bactericidal Fatty Acid Mimetic 2CCA-1 Selectively Targets Pneumococcal Extracellular Polyunsaturated Fatty Acid Metabolism
Source: PubMed Central journal article supplement (PMC7773995; doi:10.1128/mbio.03027-20), 2020-12-15
Supplement: mBio.03027-20-st001.pdf [file mBio.03027-20-st001.pdf]

**Table S1. Pneumococcal strains used in the study**

| Strain                                                                  | Identifyer | Genotype                                                                                                                                                                                       | Reference             | WGS | Fig. <sup>a</sup> |
|-------------------------------------------------------------------------|------------|------------------------------------------------------------------------------------------------------------------------------------------------------------------------------------------------|-----------------------|-----|-------------------|
| D39                                                                     | BHN853     | D39, wildtype, Serotype 2, (parental strain for BHN857-BHN860 and BHN870)                                                                                                                      | Laboratory collection | WGS |                   |
| D39- <i>fakB3</i> -mutant_1                                             | BHN857     | Spontaneous 2CCA-1 resistant D39 strain isolated after 2 hours exposure to 2CCA-1, includes a mutation in <i>fakB3</i>                                                                         | This study            | WGS | S3                |
| D39- <i>fakB3</i> -mutant_2                                             | BHN858     | Spontaneous 2CCA-1 resistant D39 strain isolated after 2 hours exposure to 2CCA-1, includes a mutation in <i>fakB3</i>                                                                         | This study            | WGS |                   |
| D39- <i>fabT</i> -mutant_1                                              | BHN859     | Spontaneous 2CCA-1 resistant D39 strain isolated after 2 hours exposure to 2CCA-1, includes a mutation in <i>fabT</i>                                                                          | This study            | WGS | S2                |
| D39- <i>fakB3</i> -mutant_3                                             | BHN860     | Spontaneous 2CCA-1 resistant D39 strain isolated after overnight exposure to 2CCA-1, includes a mutation in <i>fakB3</i>                                                                       | This study            | WGS | S3                |
| D39- <i>fakB3</i> -mutant_4                                             | BHN870     | Spontaneous 2CCA-1 resistant D39 strain isolated after overnight exposure to 2CCA-1, includes a mutation in <i>fakB3</i>                                                                       | This study            | WGS |                   |
| D39Δ <i>fakB3</i> :: <i>ermB</i>                                        | BHN2024    | Strain BHN853 with Orf <i>SPD0646</i> encoding “FakB3” replaced with an <i>ermB</i> cassette                                                                                                   | This study            |     | S3                |
| BHN857Δ <i>fakB3</i> :: <i>ermB</i>                                     | BHN2025    | Strain BHN857 with Orf <i>SPD0646</i> encoding “FakB3” replaced with an <i>ermB</i> cassette                                                                                                   | This study            |     | S3                |
| D39( <i>SPD0645</i> -∇ <i>ermB</i> - <i>SP0646</i> )                    | BHN2027    | Strain BHN853 with <i>ermB</i> cassette inserted between <i>fakB3</i> ( <i>SPD0646</i> ) and ( <i>SPD0645</i> )                                                                                | This study            |     | S3                |
| BHN857∇ <i>fakB3</i> -( <i>SPD0645</i> -∇ <i>ermB</i> - <i>SP0646</i> ) | BHN2028    | Mutant <i>fakB3</i> allele of BHN857 replaced with a wildtype <i>fakB3</i> allele and with an <i>ermB</i> cassette inserted between <i>fakB3</i> ( <i>SPD0646</i> ) and ( <i>SPD0645</i> )     | This study            |     | S3                |
| D39Δ <i>fakB1</i> :: <i>kanR</i>                                        | BHN2030    | <i>fakB1</i> ( <i>SPD1388</i> ) Orf replaced with a kanamycin resistance cassette                                                                                                              | This study            |     |                   |
| D39Δ <i>fakB2</i> :: <i>spcR</i>                                        | BHN2031    | <i>fakB2</i> ( <i>SPD0996</i> ) Orf replaced with a spectinomycin resistance cassette                                                                                                          | This study            |     |                   |
| D39Δ <i>fakB1</i> :: <i>ermB</i> Δ <i>fakB2</i> :: <i>tetR</i>          | BHN1351    | <i>fakB1</i> ( <i>SPD1388</i> ) Orf replaced with an erythromycin resistance Orf; <i>fakB2</i> ( <i>SPD0996</i> ) Orf replaced with a tetracyclin resistance Orf                               | This study            |     |                   |
| D39Δ <i>fabT</i> :: <i>ermB</i>                                         | BHN2032    | Orf <i>SPD0379</i> encoding “FabT” replaced with an <i>ermB</i> Orf                                                                                                                            | This study            |     | S2                |
| D39( <i>SPD0379</i> -∇ <i>ermB</i> - <i>SPD0380</i> )                   | BHN2022    | <i>ermB</i> Orf inserted between <i>fabT</i> ( <i>SPD0379</i> ) and <i>fabH</i> ( <i>SPD0380</i> )                                                                                             | This study            |     | S2                |
| BHN859∇ <i>fabT</i> -( <i>SPD0379</i> -∇ <i>ermB</i> - <i>SPD0380</i> ) | BHN2023    | Mutant <i>fabT</i> allele of BHN859 replaced with a wildtype <i>fabT</i> allele and with an <i>ermB</i> Orf inserted between <i>fabT</i> ( <i>SPD0379</i> ) and <i>fabH</i> ( <i>SPD0380</i> ) | This study            |     | S2                |
| D39Δ <i>lytA</i> :: <i>ermB</i>                                         | BHN2042    | Orf <i>SPD1737</i> encoding “LytA” replaced with an <i>ermB</i> cassette                                                                                                                       | This study            |     |                   |

| Strain                                                                | Identifyer | Genotype                                                                                                                                                                                     | Reference             | WGS | Fig. <sup>a</sup> |
|-----------------------------------------------------------------------|------------|----------------------------------------------------------------------------------------------------------------------------------------------------------------------------------------------|-----------------------|-----|-------------------|
| Tigr4 (T4)                                                            | BHN842     | Tigr4, wildtype, Serotype 4 (parental strain for BHN848-BHN852)                                                                                                                              | Laboratory collection | WGS |                   |
| T4- <i>fabT</i> -mutant_1                                             | BHN848     | Spontaneous 2CCA-1 resistant Tigr4 strain isolated after 2 hours exposure to 2CCA-1, includes a mutation in <i>fabT</i>                                                                      | This study            | WGS | S2                |
| T4- <i>fakB3</i> -mutant_1                                            | BHN849     | Spontaneous 2CCA-1 resistant Tigr4 strain isolated after 2 hours exposure to 2CCA-1, includes a mutation in <i>fakB3</i>                                                                     | This study            | WGS |                   |
| T4- <i>fakB3</i> -mutant_2                                            | BHN850     | Spontaneous 2CCA-1 resistant Tigr4 strain isolated after 2 hours exposure to 2CCA-1, includes a mutation in <i>fakB3</i>                                                                     | This study            | WGS |                   |
| T4- <i>fakB3</i> -mutant_3                                            | BHN851     | Spontaneous 2CCA-1 resistant Tigr4 strain isolated after overnight exposure to 2CCA-1, includes a mutation in <i>fakB3</i>                                                                   | This study            | WGS |                   |
| T4- <i>fakB3</i> -mutant_4                                            | BHN852     | Spontaneous 2CCA-1 resistant Tigr4 strain isolated after overnight exposure to 2CCA-1, includes a mutation in <i>fakB3</i>                                                                   | This study            | WGS |                   |
| T4Δ <i>fakB3</i> :: <i>ermB</i>                                       | BHN2033    | Orf SP0742 encoding “FakB3” replaced with an <i>ermB</i> cassette                                                                                                                            | This study            |     | S3                |
| T4Δ <i>fabT</i> :: <i>ermB</i>                                        | BHN2034    | Orf SP0416 encoding “FabT” replaced with an <i>ermB</i> Orf                                                                                                                                  | This study            |     | S2                |
| T4( <i>SP0416</i> -∇ <i>ermB</i> - <i>SP0417</i> )                    | BHN2035    | <i>ermB</i> Orf inserted between <i>fabT</i> ( <i>SP0416</i> ) and <i>fabH</i> ( <i>SP0417</i> )                                                                                             | This study            |     | S2                |
| BHN848∇ <i>fabT</i> -( <i>SP0416</i> -∇ <i>ermB</i> - <i>SP0417</i> ) | BHN2036    | Mutant <i>fabT</i> allele of BHN848 replaced with a wildtype <i>fabT</i> allele and with an <i>ermB</i> Orf inserted between <i>fabT</i> ( <i>SP0416</i> ) and <i>fabH</i> ( <i>SP0417</i> ) | This study            |     | S2                |
| T4Δ <i>SP0743</i> :: <i>ermB</i>                                      | BHN2037    | Orf <i>SP0743</i> encoding “transcriptional regulator, TetR family”, replaced with an <i>ermB</i> cassette                                                                                   | This study            |     | S3                |
| T4Δ <i>SP0741</i> :: <i>ermB</i>                                      | BHN2038    | Orf <i>SP0741</i> encodes “NAD(P)/FAD-dependent oxidoreductase”, replaced with an <i>ermB</i> cassette                                                                                       | This study            |     | S3                |
| T4Δ <i>SP0740</i> :: <i>ermB</i>                                      | BHN2039    | Orf <i>SP0740</i> encodes “MutT/NUDIX family protein”, replaced with an <i>ermB</i> cassette                                                                                                 | This study            |     | S3                |
| T4Δ <i>SP0740-SP0742</i> :: <i>ermB</i>                               | BHN2040    | Orfs <i>SP0740-SP0742</i> replaced with an <i>ermB</i> cassette                                                                                                                              | This study            |     | S3                |

**Notes:** <sup>a</sup>) See indicated Supplementary figure for extended information about the strain.
