# Supplementary material for: The Bactericidal Fatty Acid Mimetic 2CCA-1 Selectively Targets Pneumococcal Extracellular Polyunsaturated Fatty Acid Metabolism
Source: PubMed Central journal article supplement (PMC7773995; doi:10.1128/mbio.03027-20), 2020-12-15
Supplement: mBio.03027-20-st002.pdf [file mBio.03027-20-st002.pdf]

**Table S2. Primers used in the study**

| Primer                                              | Sequence (5'-3') <sup>a</sup>                   | Comment                                                                         |
|-----------------------------------------------------|-------------------------------------------------|---------------------------------------------------------------------------------|
| <i>Primers for making transformation constructs</i> |                                                 |                                                                                 |
| lytA-UpFr                                           | tgaccttggccttctctct                             |                                                                                 |
| lytA-UpRe-ermCassOH                                 | TGCAAGTCACACGAACACGAAattctactcctatcaattaaaac    | Non-annealing overhang (OH) seq complimentary to 5'-end of <i>ermB</i> cassette |
| lytA-DoFr-ermCassOH                                 | CTCGTCTTAATCAGCAACATtaatggaatgtcttcaaadc        | OH seq complimentary to 3'-end of <i>ermB</i> cassette                          |
| lytA-DoRe                                           | tctctgattctcaaccatc                             |                                                                                 |
| fakB3-UpFr                                          | tctctttctccttttctct                             |                                                                                 |
| fakB3-UpRe-ermCassOH                                | GCAAGTCACACGAACACGAAagaattctccatcttctgacg       | OH seq complimentary to 5'-end of <i>ermB</i> cassette                          |
| fakB3-DoFr-ermCassOH                                | CTCGTCTTAATCAGCAACATtgcatcttgacaagaggt          | OH seq complimentary to 3'-end of <i>ermB</i> cassette                          |
| fakB3-DoRe                                          | tagggtcacatcgccagaga                            |                                                                                 |
| fakB3-Orf-UpRe-ermCassOH                            | TGCAAGTCACACGAACACGAAttaatcaattcatagccca        | OH seq complimentary to 5'-end of <i>ermB</i> cassette                          |
| fakB1-UpFr                                          | ccacaaaattagtaatatcc                            |                                                                                 |
| fakB1-UpRev-kanCassOH                               | TGCAAGTCACACGAACACGAAattagaactccaaattaattctct   | OH seq complimentary to 5'-end of <i>kan</i> cassette                           |
| fakB1-DoFrw-kanCassOH                               | TGCTCGTCTTAATCAGCAACATttggcgctctaggctagttaag    | OH seq complimentary to 3'-end of <i>kan</i> cassette                           |
| fakB1-UpRe-ermOrfOH                                 | GAGAATATTTTATATTTTGTTCATattagaactccaaattaattc   | OH seq complimentary to 5'-end of <i>ermB</i> Orf                               |
| fakB1-DoFr-ermOrfOH                                 | CTATTATTTAACGGGAGGAAATAAttggcgctctaggctagttaag  | OH seq complimentary to 3'-end of <i>ermB</i> Orf                               |
| fakB1-DoRe                                          | tccacattgggaaatatttg                            |                                                                                 |
| fakB2-UpFr                                          | aacacgagaaacaataaaaac                           |                                                                                 |
| fakB2-UpRe-spcCassOH                                | TGCAAGTCACACGAACACGAAagtatcaatcttctatttagg      | OH seq complimentary to 5'-end of <i>spcR</i> cassette                          |
| fakB2-DoFr-spcCassOH                                | TGCTCGTCTTAATCAGCAACATAaaataaataaaattggaagaaat  | OH seq complimentary to 3'-end of <i>spcR</i> cassette                          |
| fakB2-DoRe                                          | cttcaactatctgttgattttc                          |                                                                                 |
| fakB2-UpRe-tetOrfOH                                 | TTTTCATGTGATTTTCCTCCATagtatcaatcttctatttagg     | OH seq complimentary to 5'-end of <i>tetM</i> Orf                               |
| fakB2-DoFr-tetOrfOH                                 | TGTTCAATAAAATAACTTAGaaaataaataaaattggaagaaatagc | OH seq complimentary to 3'-end of <i>tetM</i> Orf                               |
| fabT-UpFr                                           | tcaagcaaatagccaaacct                            |                                                                                 |
| fabT-UpRe-ermOrf-OH                                 | GAGAATATTTTATATTTTGTTCATtttcatatccctcctctt      | OH seq complimentary to 5'-end of <i>ermB</i> Orf                               |
| fabT-DoFr-ermOrf-OH                                 | CTATTATTTAACGGGAGGAAATAAttggctttgcaaaaataagtcag | OH seq complimentary to 3'-end of <i>ermB</i> Orf                               |
| fabT-DoRe                                           | ctgaaatggagaatgcaaac                            |                                                                                 |

| Primer                                                                 | Sequence (5'-3') <sup>a</sup>                    | Comment                                                |
|------------------------------------------------------------------------|--------------------------------------------------|--------------------------------------------------------|
| fabTOrf-UpRe-ermOrf-OH                                                 | TGAGAATATTTTATATTTTGTTCAttatttcaaatcctccaaaattgg | OH seq complimentary to 5'-end of <i>ermB</i> Orf      |
| SP0743-UpFr                                                            | caacttcaccaccagcagat                             |                                                        |
| SP0743-UpRe-ErmCass-OH                                                 | GCAAGTCACACGAACACGAAaacattttcttctactgtca         | OH seq complimentary to 5'-end of <i>ermB</i> cassette |
| SP0743-DoFr-ErmCass-OH                                                 | CTCGTCTTAATCAGCAACATagaaaaaggagaaaagagatga       | OH seq complimentary to 3'-end of <i>ermB</i> cassette |
| SP0743-DoRe                                                            | gatcagcctcttaagagct                              |                                                        |
| SP0741-UpFr                                                            | tgtctttgaagaagtgtt                               |                                                        |
| SP0741-UpRe-ermCass-OH                                                 | TCGTCTTAATCAGCAACATagctctattgtaccacaa            | OH seq complimentary to 5'-end of <i>ermB</i> cassette |
| SP0741-DoFr-ermCass-OH                                                 | AGTCACACGAACACGAAagattaaggtgtgaaga               | OH seq complimentary to 3'-end of <i>ermB</i> cassette |
| SP0741-DoRe                                                            | atgcagaataaataggcta                              |                                                        |
| SP0740-UpFr                                                            | actttggttgcaggctct                               |                                                        |
| SP0740-UpRe-ermCass-OH                                                 | GCTCGTCTTAATCAGCAACATtcttcacaaccttaacttta        | OH seq complimentary to 5'-end of <i>ermB</i> cassette |
| SP0740-DoFr-ermCass-OH                                                 | GCAAGTCACACGAACACGAAaaaataggctaggaattccta        | OH seq complimentary to 3'-end of <i>ermB</i> cassette |
| SP0740-DoRe                                                            | acatctggataccttgatttc                            |                                                        |
| <i>Primers used to construct antibiotic resistance cassettes</i>       |                                                  |                                                        |
| pSp72-Fr                                                               | ttctatgagtcgctttttaa                             |                                                        |
| pSp72-Re                                                               | gtaatcactcctcttaattac                            |                                                        |
| kanOrf-Fr-pSp72-OH                                                     | GTAATTAAGAAGGAGTGATTACatggctaaaatgagaatatca      |                                                        |
| kanOrf-Re-pSp72-OH                                                     | ATTTACAAAAGCGACTCATAGAActaaaacaattcatccagtaa     |                                                        |
| spcOrf-Fr-pSp72-OH                                                     | GTAATTAAGAAGGAGTGATTACatgaatacatacgaacaatta      |                                                        |
| spectOrf-Re-pSp72-OH                                                   | ATTTACAAAAGCGACTCATAGAActataatttttaactgttattta   |                                                        |
| <i>Primers used to amplify antibiotic resistance Orfs or cassettes</i> |                                                  |                                                        |
| AbCass-Fr                                                              | ttcgtgtcgtgacttgca                               |                                                        |
| AbCass-Re                                                              | atgttgctgattaagacgagca                           |                                                        |
| ErmOrf-Fr                                                              | atgaacaaaaatataaaaatattctc                       |                                                        |
| ErmOrf-Re                                                              | ttatttctcccgttaataatag                           |                                                        |
| KanOrf-Fr                                                              | atggctaaaatgagaatatca                            |                                                        |
| KanOrf-Re                                                              | ctaaaacaattcatccagtaaaa                          |                                                        |
| TetOrf-Fr                                                              | atggaggaaaatcacatgaaaa                           |                                                        |
| TetOrf-Re                                                              | ctaagttattttattgaacatatatc                       |                                                        |

| Primer                                                                   | Sequence (5'-3') <sup>a</sup>             | Comment                                                                                                     |
|--------------------------------------------------------------------------|-------------------------------------------|-------------------------------------------------------------------------------------------------------------|
| <i>Primers used to produce amplicons for sequencing of transformants</i> |                                           |                                                                                                             |
| lytUpFr-seq                                                              | atgagttcaattgtatctatc                     |                                                                                                             |
| lytDoRe-seq                                                              | cattcctcaatctatataaca                     |                                                                                                             |
| fakB3-UpFr-seq                                                           | gaatcgcgcccacttttagcac                    |                                                                                                             |
| fakB3-DoRe-seq                                                           | ctttgacaaaagctagacatgc                    |                                                                                                             |
| fakB1-UpFr-seq                                                           | tacaataccacaggtgatggt                     |                                                                                                             |
| fakB1-DoRe-seq                                                           | cttgctgaatggactctcga                      |                                                                                                             |
| fakB2-UpFr-seq                                                           | cttccgaggtcatcattaatc                     |                                                                                                             |
| fakB2-DoRe-seq                                                           | agtatagcatgttccctaag                      |                                                                                                             |
| fabT-UpFr-seq                                                            | gagatttgtagagatgaag                       |                                                                                                             |
| fabT-DoRe-seq                                                            | tcaatagtctgcttgatagact                    |                                                                                                             |
| tesS-UpFr-seq                                                            | ctgaaactggctggttttgaca                    |                                                                                                             |
| tesS-DoRe-seq                                                            | gtaaaacctgctgccaag                        |                                                                                                             |
| acpB-UpFr-seq                                                            | acgagagctattcggaataag                     |                                                                                                             |
| acpB-DoRe-seq                                                            | aatccataattaccaaca                        |                                                                                                             |
| SP0743-UpFr-seq                                                          | tttttctgataggcgggga                       |                                                                                                             |
| SP0743-DoRe-seq                                                          | ccatttttgaattcctct                        |                                                                                                             |
| SP0741-UpFr-seq                                                          | atatttatctggaagaccat                      |                                                                                                             |
| SP0741-DoRe-seq                                                          | agagtttaaggaaaacattga                     |                                                                                                             |
| SP0740-UpFr-seq                                                          | agattttccacataaagcct                      |                                                                                                             |
| SP0740-DoRe-seq                                                          | atagcagagctgttaaagga                      |                                                                                                             |
| <i>Primers for cloning fakB3 promoter into pPP2 vector</i>               |                                           |                                                                                                             |
| pPP2-Fr                                                                  | atgaaacatctgatcccgtc                      | Forward primer for amplifying pPP2                                                                          |
| pPP2-Re                                                                  | gattctagactagaattcgca                     | Reverse primer for amplifying pPP2                                                                          |
| PfakB3-Fr-pPP2-OH                                                        | TGCGAATTCTAGTCTAGAATCaacattttcttctactgt   | Amplifies fakB3 promoter with an overhang sequence complementary to 3' end of the PCR amplified pPP2 vector |
| PfakB3-Re-pPP2-OH                                                        | ACGGGATCAAGATGTTTCATagaaattcctcatctttgtca | Amplifies fakB3 promoter with an overhang sequence complementary to 5' end of the PCR amplified pPP2 vector |
| pPP2-seq-Fr                                                              | tgctcgcttcgctacttgga                      | Forward primer – amplifies a 308 bp fragment including the <i>fakB3</i> promoter                            |
| pPP2-seq-Re                                                              | aggcgattaagttgggtaac                      | Reverse primer – amplifies a 308 bp fragment including the <i>fakB3</i> promoter                            |

| Primer                                                                            | Sequence (5'-3') <sup>a</sup>              | Comment                                                                                                                                                                                |
|-----------------------------------------------------------------------------------|--------------------------------------------|----------------------------------------------------------------------------------------------------------------------------------------------------------------------------------------|
| <i>Primers for cloning fabT-c-6His into pET21d protein expression vector</i>      |                                            |                                                                                                                                                                                        |
| pET21-Fr-6His-OH                                                                  | CACCATCACCATCACCATTAAccaagcttgggcccgaaca   | Forward primer for amplifying pET21d with an overhang sequence including six histidine codons plus a TAA Stop codon                                                                    |
| pET21-Re                                                                          | gctagccaaggtatatctct                       | Reverse primer for amplifying pET21d                                                                                                                                                   |
| fabT-Fr-pET21-OH                                                                  | GGAGATATACCTTGGCTAGCatggactaccaacgaatcaat  | Forward primer for amplifying <i>fabT</i> Orf with an overhang sequence complementary to the 3' end of the amplified pET21 vector                                                      |
| fabT-Re-6His-OH                                                                   | TTAATGGTGATGGTGATGGTGttcaaatcctccaaaattggt | Forward primer for amplifying <i>fabT</i> Orf with an overhang sequence including six histidine codons plus a TAA Stop codon complementary to the 5' end of the amplified pET21 vector |
| <i>Primers for amplifying the 300bp GAPDH fragments used for EMSA experiments</i> |                                            |                                                                                                                                                                                        |
| GAPDH300-Fr                                                                       | aaagttggtattaacggtttcg                     | Forward primer for amplifying the 300bp GAPDH fragments with FabT binding sites from the <i>fabT</i> and <i>fabK</i> promoter included, and with no binding site                       |
| GAPDH300-Re                                                                       | tttcttagcaaagaaccagtagc                    | Reverse primer for amplifying the 300bp GAPDH fragments with FabT binding sites from the <i>fabT</i> and <i>fabK</i> promoter included, and with no binding site                       |
| <i>qPCR primer</i>                                                                |                                            |                                                                                                                                                                                        |
| fakB3-qPCR-Fr                                                                     | caactgccaacaccagctat                       |                                                                                                                                                                                        |
| fakB3-qPCR-Rev                                                                    | ccttcaaatgctcgcaaata                       |                                                                                                                                                                                        |
| fabK-qPCR-Fr                                                                      | ccctttgtggaagacatcgt                       |                                                                                                                                                                                        |
| fabK-qPCR-Rev                                                                     | cgattatcccagcttcatgg                       |                                                                                                                                                                                        |
| gyrA-qPCR-Fr                                                                      | gttcgcttggttcaggaaaa                       |                                                                                                                                                                                        |
| gyrA-qPCR-Rev                                                                     | tgcatttgggtcattttga                        |                                                                                                                                                                                        |

**Notes:** <sup>a</sup>) Annealing sequences are displayed in lower case letters and non-annealing overhang sequences in upper case letters
